# Supplementary material for: Differential Signaling Profiles of MC4R Mutations with Three Different Ligands
Source: MDPI journal article supplement (doi:10.3390/ijms21041224), 2020-02-12
Supplement: s1 [file s1]

**Supplementary Materials/Data**

**Table S1.** Quantification of endosomes from the confocal images. It lists the average number of endosomes measured per cell, for each mutant. Values represent quantifications of three to five independent experiments  $\pm$  SEM.

| <b>MC4R<br/>mutations</b> | <b>&lt;N&gt; of<br/>endosomes/cell<br/><math>\pm</math> SEM</b> |
|---------------------------|-----------------------------------------------------------------|
| WT                        | 17 $\pm$ 8                                                      |
| V103I                     | 6 $\pm$ 2                                                       |
| S127L                     | 35 $\pm$ 6                                                      |
| H158R                     | 41 $\pm$ 8                                                      |

**Table S2.** Basal (fold of WT basal), efficacy ( $E_{max}$  as fold over WT basal), potency ( $EC_{50}$  in nM) and bias values of activation of  $G_s$  signaling and  $\beta$ -arrestin2 recruitment of MC4R mutations V103I, S127L and H158R in comparison to the MC4R WT are given as  $\pm$  SEM resulting from of 3 to 7 independent experiments performed in triplicates... Please note that the bias is the difference between two effects that result in a negative value for loss-of-function mutations. After calculation of the bias value ( $10^{\text{Alog}(E_{max}/EC_{50})}$ ) the outcome of those is very close to zero and is stated as 0.00.

| Signaling pathway |                   | cAMP via $G_s$ signaling |                   |                     |                         |                  |                 |                    |                  |                  | $\beta$ -arrestin2 recruitment |                        |                     |                     |                        |                     |                     |                       |                     |                     |
|-------------------|-------------------|--------------------------|-------------------|---------------------|-------------------------|------------------|-----------------|--------------------|------------------|------------------|--------------------------------|------------------------|---------------------|---------------------|------------------------|---------------------|---------------------|-----------------------|---------------------|---------------------|
| MC4R mutation     | basal             | $\alpha$ -MSH            |                   |                     | $\beta$ -MSH            |                  |                 | NDP- $\alpha$ -MSH |                  |                  | basal                          | $\alpha$ -MSH          |                     |                     | $\beta$ -MSH           |                     |                     | NDP- $\alpha$ -MSH    |                     |                     |
|                   |                   | $EC_{50}$                | $E_{max}$         | bias                | $EC_{50}$               | $E_{max}$        | bias            | $EC_{50}$          | $E_{max}$        | bias             |                                | $EC_{50}$              | $E_{max}$           | bias                | $EC_{50}$              | $E_{max}$           | bias                | $EC_{50}$             | $E_{max}$           | bias                |
| WT                | 1.00 $\pm$ 0.13   | 10.12 $\pm$ 3.78         | 23.84 $\pm$ 1.94  | 1.00 $\pm$ 0.00     | 32.70 $\pm$ 10.86       | 10.05 $\pm$ 0.75 | 1.00 $\pm$ 0.00 | 3.98 $\pm$ 2.17    | 9.52 $\pm$ 1.15  | 1.00 $\pm$ 0.000 | 1.00 $\pm$ 0.01                | 154.48 $\pm$ 0.03      | 2.18 $\pm$ 0.09     | 1.00 $\pm$ 0.00     | 281.20 $\pm$ 0.07      | 1.93 $\pm$ 0.03     | 1.00 $\pm$ 0.00     | 106.48 $\pm$ 0.00     | 1.91 $\pm$ 0.02     | 1.00 $\pm$ 0.00     |
| V103I             | 1.05 $\pm$ 0.11   | 16.19 $\pm$ 6.21         | 16.91 $\pm$ 2.12  | 0.83 $\pm$ 0.26     | 101.86 $\pm$ 46.05      | 8.69 $\pm$ 1.10  | 0.28 $\pm$ 0.32 | 2.12 $\pm$ 0.36    | 6.66 $\pm$ 1.01  | 1.32 $\pm$ 0.510 | 0.38 $\pm$ 0.01 ***            | 164.51 $\pm$ 0.06 ***  | 1.71 $\pm$ 0.10*    | 0.74 $\pm$ 0.04 *** | 243.29 $\pm$ 0.05 ***  | 1.35 $\pm$ 0.02 *** | 0.81 $\pm$ 0.00 *** | 57.99 $\pm$ 0.00 ***  | 1.34 $\pm$ 0.01 *** | 1.29 $\pm$ 0.01 *** |
| S127L             | 1.01 $\pm$ 0.10   | n.d.                     | n.d.              | 0.03 $\pm$ 0.06     | 870.23 $\pm$ 147.64 *** | 2.90 $\pm$ 2.67* | 0.01 $\pm$ 0.87 | 12.87 $\pm$ 8.84   | 3.27 $\pm$ 0.36  | 0.11 $\pm$ 0.415 | 0.85 $\pm$ 0.01 ***            | 1012.37 $\pm$ 0.51 *** | 1.11 $\pm$ 0.02 *** | 0.08 $\pm$ 0.04 *** | 2044.70 $\pm$ 0.48 *** | 1.01 $\pm$ 0.01 *** | 0.07 $\pm$ 0.01 *** | 54.97 $\pm$ 0.02 ***  | 1.12 $\pm$ 0.01 *** | 1.14 $\pm$ 0.00 *   |
| H158R             | 1.43 $\pm$ 0.14 * | 3.04 $\pm$ 5.18          | 34.38 $\pm$ 3.16* | 4.80 $\pm$ 1.67 *** | 29.11 $\pm$ 14.90       | 14.85 $\pm$ 1.27 | 1.66 $\pm$ 0.39 | 1.96 $\pm$ 0.22    | 12.17 $\pm$ 1.41 | 2.60 $\pm$ 0.534 | 0.68 $\pm$ 0.02 ***            | 246.52 $\pm$ 0.07 ***  | 1.54 $\pm$ 0.10*    | 0.44 $\pm$ 0.04 *** | 473.86 $\pm$ 0.02 ***  | 1.68 $\pm$ 0.02 *** | 0.52 $\pm$ 0.01 *** | 59.86 $\pm$ 0.002 *** | 1.56 $\pm$ 0.01 *** | 1.46 $\pm$ 0.01 *** |

\* $p \leq 0.05$ , \*\*  $p \leq 0.01$ , \*\*\*  $p \leq 0.001$ , Statistical analysis has been performed using one-way ANOVA for basal and  $E_{max}$  value comparison to WT and two-way ANOVA for bias and  $EC_{50}$  value comparison to WT, followed by Dunnett's post-hoc test. When maximal response was lower than 25% of the maximal response of WT, values for  $EC_{50}$  and  $E_{max}$  are stated as not determinable (n.d.). Nevertheless, for the purpose of bias value calculation,  $EC_{50}$  and  $E_{max}$  were set as described in the method section.

**Table S3.** Basal (fold of WT basal), efficacy ( $E_{max}$  as fold over WT basal), potency ( $EC_{50}$  in nM) and bias values of activation of  $G_{i/o}$  and  $G_{q/11}$  signaling of *MC4R* mutations V103I, S127L and H158R in comparison to the *MC4R* WT are given as  $\pm$  SEM resulting from of 3 to 7 independent experiments performed in triplicates. Please note that the bias is the difference between two effects that result in a negative value for loss-of-function mutations. After calculation of the bias value ( $10^{\Delta \log(E_{max}/EC_{50})}$ ) the outcome of those is very close to zero and is stated as 0.00.

| Signaling pathway |                 | PTX-sensitive cAMP via $G_{i/o}$ signaling |                   |                 |                    |                  |                  |                    |                  |                 | PLC activation via $G_{q/11}$ signaling |                      |                   |                    |                     |                  |                    |                     |                  |                    |
|-------------------|-----------------|--------------------------------------------|-------------------|-----------------|--------------------|------------------|------------------|--------------------|------------------|-----------------|-----------------------------------------|----------------------|-------------------|--------------------|---------------------|------------------|--------------------|---------------------|------------------|--------------------|
| MC4R mutation     | basal           | $\alpha$ -MSH                              |                   |                 | $\beta$ -MSH       |                  |                  | NDP- $\alpha$ -MSH |                  |                 | basal                                   | $\alpha$ -MSH        |                   |                    | $\beta$ -MSH        |                  |                    | NDP- $\alpha$ -MSH  |                  |                    |
|                   |                 | $EC_{50}$                                  | $E_{max}$         | bias            | $EC_{50}$          | $E_{max}$        | bias             | $EC_{50}$          | $E_{max}$        | bias            |                                         | $EC_{50}$            | $E_{max}$         | bias               | $EC_{50}$           | $E_{max}$        | bias               | $EC_{50}$           | $E_{max}$        | bias               |
| WT                | 1.18 $\pm$ 0.14 | 19.31 $\pm$ 6.16                           | 39.08 $\pm$ 4.38  | 1.00 $\pm$ 0.00 | 118,10 $\pm$ 51.92 | 26.86 $\pm$ 2.53 | 1.00 $\pm$ 0.00  | 47.42 $\pm$ 37.15  | 15.82 $\pm$ 1.81 | 1.00 $\pm$ 0.00 | 1.00 $\pm$ 0.17                         | 488.87 $\pm$ 0.02    | 7.67 $\pm$ 1.97   | 1.00 $\pm$ 0.00    | 106.67 $\pm$ 0.04   | 6.58 $\pm$ 0.58  | 1.00 $\pm$ 0.00    | 30.36 $\pm$ 0.01    | 6.36 $\pm$ 0.58  | 1.00 $\pm$ 0.00    |
|                   |                 |                                            |                   |                 |                    |                  |                  |                    |                  |                 |                                         |                      |                   |                    |                     |                  |                    |                     |                  |                    |
| V103I             | 1.65 $\pm$ 0.11 | 165.45 $\pm$ 111.21                        | 30.17 $\pm$ 12.26 | 0.09 $\pm$ 0.71 | 41.15 $\pm$ 21.85  | 16.65 $\pm$ 2.19 | 1.78 $\pm$ 0.31  | 38.42 $\pm$ 25.82  | 8.36 $\pm$ 1.02  | 0.65 $\pm$ 0.19 | 1.11 $\pm$ 0.22                         | 89.10 $\pm$ 0.03***  | 6.03 $\pm$ 1.06   | 4.31 $\pm$ 0.19*** | 63.37 $\pm$ 0.03*** | 14.65 $\pm$ 1.67 | 3.75 $\pm$ 0.07*** | 68.19 $\pm$ 0.03*** | 11.03 $\pm$ 1.35 | 0.77 $\pm$ 0.08    |
|                   |                 |                                            |                   |                 |                    |                  |                  |                    |                  |                 |                                         |                      |                   |                    |                     |                  |                    |                     |                  |                    |
| S127L             | 1.57 $\pm$ 0.19 | n.d.                                       | n.d.              | 0.00 $\pm$ 0.22 | n.d.               | n.d.             | 0.02 $\pm$ 0.16  | n.d.               | n.d.             | 0.06 $\pm$ 1.21 | 0.84 $\pm$ 0.19**                       | n.d.                 | n.d.              | 0.01 $\pm$ 0.09*** | n.d.                | n.d.             | 0.00 $\pm$ 0.18*** | n.d.                | n.d.             | 0.00 $\pm$ 0.16*** |
|                   |                 |                                            |                   |                 |                    |                  |                  |                    |                  |                 |                                         |                      |                   |                    |                     |                  |                    |                     |                  |                    |
| H158R             | 1.11 $\pm$ 0.23 | 29.05 $\pm$ 15.40                          | 65.65 $\pm$ 10.85 | 1.12 $\pm$ 0.44 | 50.32 $\pm$ 30.32  | 38.55 $\pm$ 5.90 | 3.37 $\pm$ 0.43* | 70.78 $\pm$ 40.90  | 14.34 $\pm$ 1.66 | 0.61 $\pm$ 0.22 | 1.37 $\pm$ 0.39                         | 163.29 $\pm$ 0.02*** | 10.88 $\pm$ 2.72* | 4.25 $\pm$ 0.06*** | 53.24 $\pm$ 0.02*** | 10.40 $\pm$ 1.95 | 3.17 $\pm$ 0.17*** | 39.21 $\pm$ 0.05*** | 9.94 $\pm$ 2.16  | 1.21 $\pm$ 0.20    |
|                   |                 |                                            |                   |                 |                    |                  |                  |                    |                  |                 |                                         |                      |                   |                    |                     |                  |                    |                     |                  |                    |

\* $p \leq 0.05$ , \*\*  $p \leq 0.01$ , \*\*\*  $p \leq 0.001$ , Statistical analysis has been performed using one-way ANOVA for basal and  $E_{max}$  value comparison and two-way ANOVA for bias and  $EC_{50}$  value comparison, followed by Dunnett's post-hoc test; <sup>#</sup>  $EC_{50}$  was set to highest concentration when outside of tested concentration range. When maximal response was lower than 25% of the maximal response of WT, values for  $EC_{50}$  and  $E_{max}$  are stated as not determinable (n.d.). Nevertheless, for the purpose of bias value calculation,  $EC_{50}$  and  $E_{max}$  were set as described in the method section.

**Table S4.** Basal (fold of WT basal), efficacy ( $E_{max}$  as fold over WT basal), potency ( $EC_{50}$  in nM) and bias values of activation of  $G_{12/13}$  and ERK phosphorylation of *MC4R* mutations V103I, S127L and H158R in comparison to the *MC4R* WT are given as  $\pm$  SEM resulting from of 3 to 7 independent experiments performed in triplicates.

Please note that the bias is the difference between two effects that result in a negative value for loss-of-function mutations. After calculation of the bias value ( $10^{\text{Alog}(E_{max}/EC_{50})}$ ) the outcome of those is very close to zero and is stated as 0.00.

| Signaling pathway |                    | RhoA activation via $G_{12/13}$ signaling |                  |                     |                          |                    |                     |                       |                    |                     | ERK phosphorylation |                      |                  |                     |                      |                 |                     |                     |                  |                     |
|-------------------|--------------------|-------------------------------------------|------------------|---------------------|--------------------------|--------------------|---------------------|-----------------------|--------------------|---------------------|---------------------|----------------------|------------------|---------------------|----------------------|-----------------|---------------------|---------------------|------------------|---------------------|
| MC4R mutation     | basal              | $\alpha$ -MSH                             |                  |                     | $\beta$ -MSH             |                    |                     | NDP- $\alpha$ -MSH    |                    |                     | basal               | $\alpha$ -MSH        |                  |                     | $\beta$ -MSH         |                 |                     | NDP- $\alpha$ -MSH  |                  |                     |
|                   |                    | $EC_{50}$                                 | $E_{max}$        | bias                | $EC_{50}$                | $E_{max}$          | bias                | $EC_{50}$             | $E_{max}$          | bias                |                     | $EC_{50}$            | $E_{max}$        | bias                | $EC_{50}$            | $E_{max}$       | bias                | $EC_{50}$           | $E_{max}$        | bias                |
| WT                | 1.00 $\pm$ 0.20    | 77.21 $\pm$ 0.02                          | 2.93 $\pm$ 0.47  | 1.00 $\pm$ 0.00     | 59.83 $\pm$ 0.05         | 2.40 $\pm$ 0.42    | 1.00 $\pm$ 0.00     | 4.68 $\pm$ 0.00       | 3.07 $\pm$ 0.39    | 1.00 $\pm$ 0.00     | 1.00 $\pm$ 0.18     | 151.24 $\pm$ 0.02    | 7.05 $\pm$ 0.69  | 1.00 $\pm$ 0.00     | 321.15 $\pm$ 0.11    | 4.94 $\pm$ 0.61 | 1.00 $\pm$ 0.00     | 17.22 $\pm$ 0.01    | 7.47 $\pm$ 0.89  | 1.00 $\pm$ 0.00     |
| V103I             | 1.27 $\pm$ 0.21    | 180.59 $\pm$ 0.14***                      | 6.09 $\pm$ 1.24* | 0.59 $\pm$ 0.16 *   | 18.75 $\pm$ 0.01***      | 2.29 $\pm$ 0.50    | 3.05 $\pm$ 0.13 *** | 3.01 $\pm$ 0.00       | 3.31 $\pm$ 0.34    | 1.68 $\pm$ 0.08 *** | 1.22 $\pm$ 0.21     | 131.91 $\pm$ 0.02*** | 8.37 $\pm$ 0.62  | 1.21 $\pm$ 0.03     | 244.77 $\pm$ 0.15*** | 5.14 $\pm$ 0.42 | 1.37 $\pm$ 0.09     | 9.66 $\pm$ 0.00***  | 7.43 $\pm$ 0.55  | 1.77 $\pm$ 0.09 *** |
| S127L             | 1.12 $\pm$ 0.22    | n.d.                                      | n.d.             | 0.00 $\pm$ 0.25 *** | 10000.00 $\pm$ 2.16*** # | 0.80 $\pm$ 0.12*** | 0.00 $\pm$ 0.10 *** | 2611.84 $\pm$ 2.13*** | 1.25 $\pm$ 0.20*** | 0.00 $\pm$ 0.09 *** | 1.21 $\pm$ 0.16     | n.d.                 | n.d.             | 0.01 $\pm$ 0.22 *** | n.d.                 | n.d.            | 0.01 $\pm$ 0.23 *** | 65.80 $\pm$ 0.01*** | 2.68 $\pm$ 0.27* | 0.09 $\pm$ 0.06 *** |
| H158R             | 0.75 $\pm$ 0.11 ** | 107.47 $\pm$ 0.03***                      | 2.82 $\pm$ 0.34  | 1.32 $\pm$ 0.07     | 39.10 $\pm$ 0.13***      | 2.18 $\pm$ 0.38    | 1.39 $\pm$ 0.03 *   | 1.56 $\pm$ 0.00*      | 1.99 $\pm$ 0.30    | 1.95 $\pm$ 0.08 *** | 1.38 $\pm$ 0.22     | 273.76 $\pm$ 0.06*** | 10.18 $\pm$ 2.24 | 0.67 $\pm$ 0.07     | 153.71 $\pm$ 0.06*** | 5.55 $\pm$ 0.46 | 2.35 $\pm$ 0.09 *** | 8.09 $\pm$ 0.00***  | 9.64 $\pm$ 0.51  | 2.75 $\pm$ 0.11 *** |

\* $p \leq 0.05$ , \*\*  $p \leq 0.01$ , \*\*\*  $p \leq 0.001$ , Statistical analysis has been performed using one-way ANOVA for basal and  $E_{max}$  value comparison and two-way ANOVA for bias and  $EC_{50}$  value comparison, followed by Dunnett's post-hoc test. When maximal response was lower than 25% of the maximal response of WT, values for  $EC_{50}$  and  $E_{max}$  are stated as not determinable (n.d.). Nevertheless, for the purpose of bias value calculation,  $EC_{50}$  and  $E_{max}$  were set as described in the method section. Nevertheless, for the purpose of bias value calculation,  $EC_{50}$  and  $E_{max}$  were set as described in the method section.

**Table S5.** Mutation were introduced into MC4R cDNA by site-directed mutagenesis using the following primer, base pair substitution is printed in **bold**.

| <b>MC4R mutation</b> | <b>Mutagenesis primer</b> | <b>sequence</b>                           |
|----------------------|---------------------------|-------------------------------------------|
| V103I                | MC4R_mut_V103I_F          | GGATCAGAAACCATTATCATCACCCCTATTAA          |
|                      | MC4R_mut_V103I_R          | TTAATAGGGTGATGATAATGGTTTCTGATCC           |
| S127L                | MC4R_mut_S127L_F          | GATAATGTCATTGACTTGGTGATCTGTAGCTCC         |
|                      | MC4R_mut_S127L_R          | GGAGCTACAGATCACCAAGTCAATGACATTATC         |
| H158R                | MC4R_mut_H158R_F          | CTTCTATGCTCTCCAGTACCGTAACATTATGACAGTTAAGC |
|                      | MC4R_mut_H158R_R          | GCTTAACTGTCATAATGTTACGGTACTGGAGAGCATAGAAG |

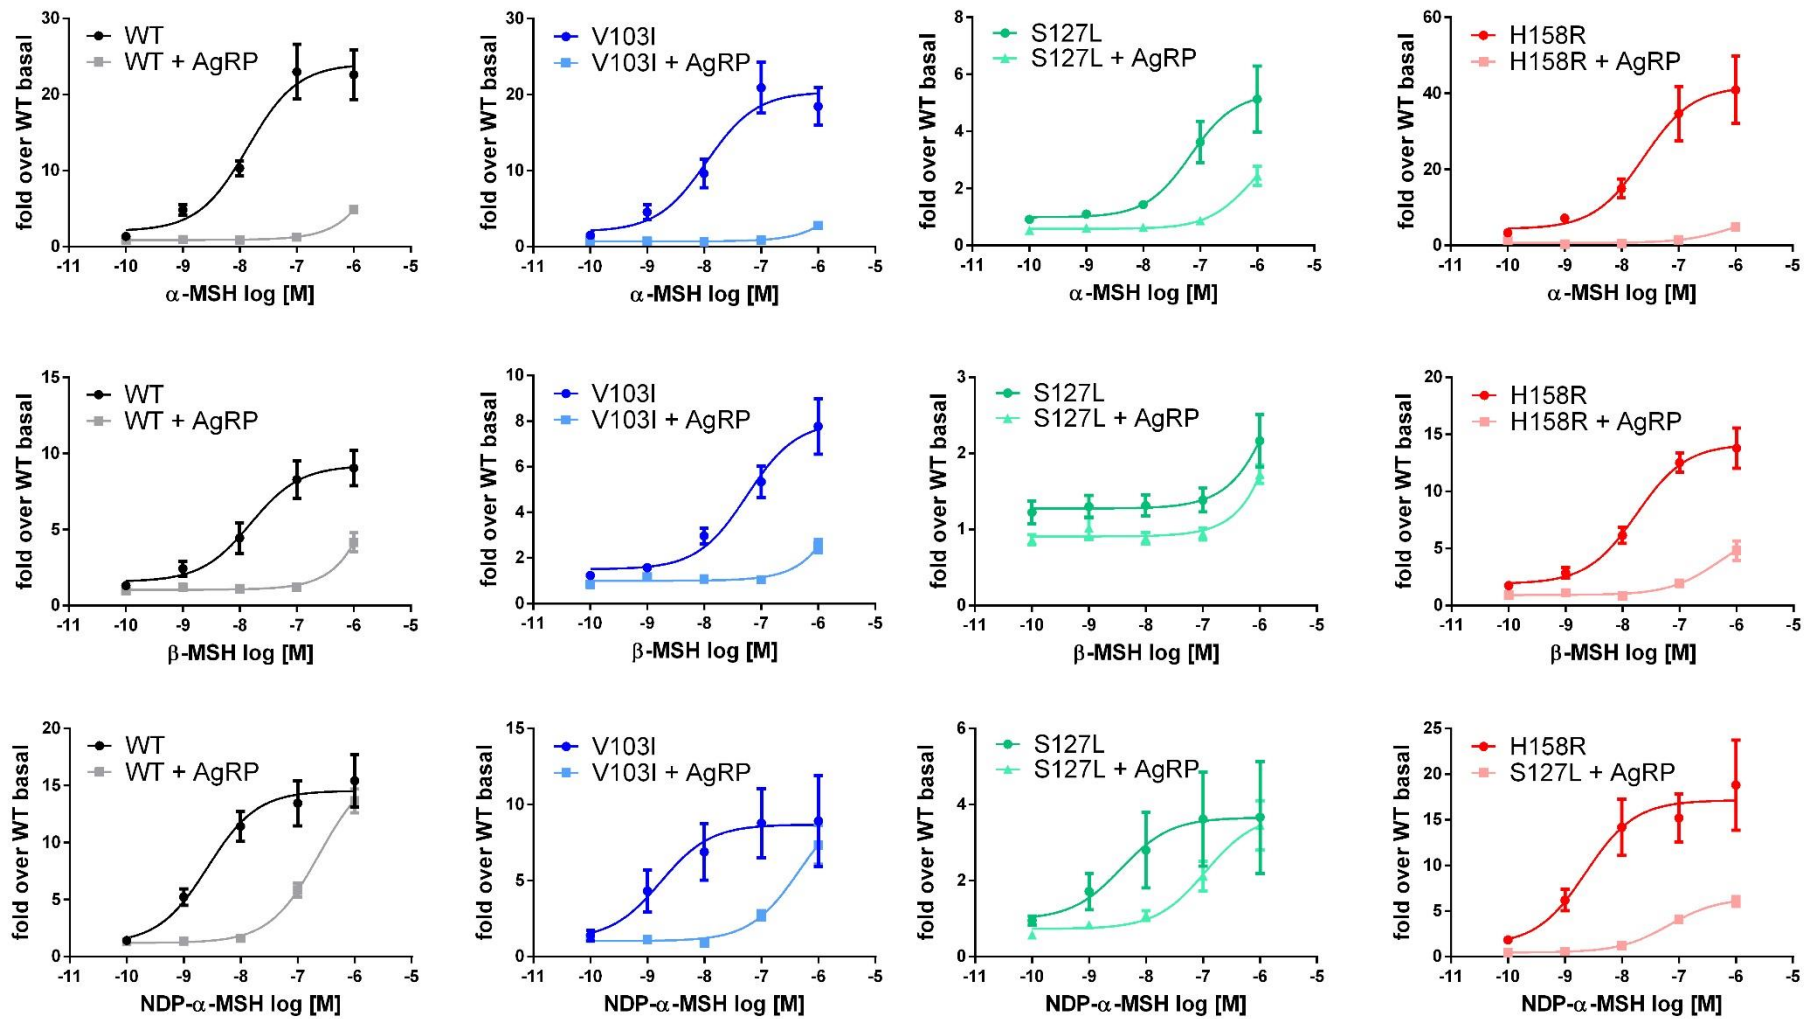

**Figure S1.** The antagonist AgRP decreased G<sub>s</sub> signaling for all tested MC4R mutations and ligands. The datasets contain pooled data from three to four independent experiments each performed in triplicates. All concentration-response curves were analyzed with Graph Pad Prism 6.0 using the non-linear regression model (sigmoidal response).

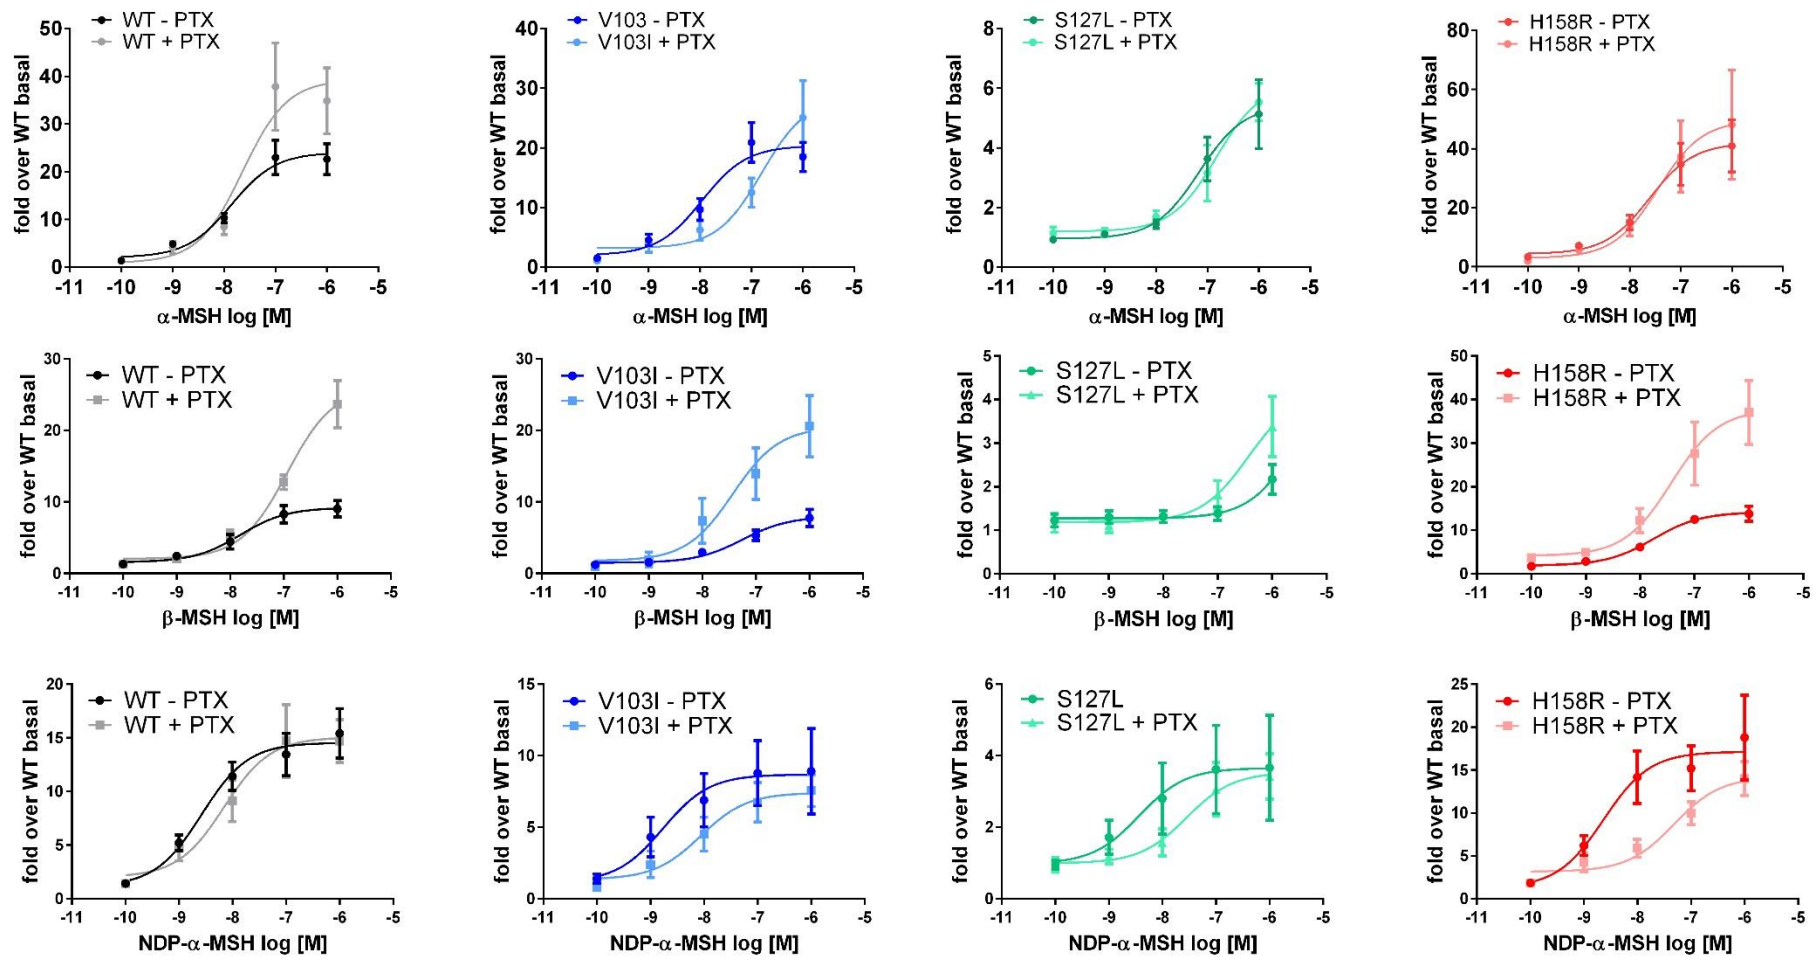

**Figure S2. Contributions from  $G_{i/o}$  coupling was determined by measuring the PTX-sensitive cAMP accumulation.** The datasets contain pooled data from three to five independent experiments each performed in triplicates. All concentration-response curves were analyzed with Graph Pad Prism 6.0 using the non-linear regression model (sigmoidal response).
